# Supplementary material for: High expression of RNF31 is associated with tumor immune cell infiltration and leads to poor prognosis in liver hepatocellular carcinoma
Source: Sci Rep. 2023 Apr 28;13:6957. doi: 10.1038/s41598-023-32692-4 (PMC10147728; doi:10.1038/s41598-023-32692-4)
Supplement: Supplementary file 1 — Supplementary Information 1. [file 41598_2023_32692_MOESM1_ESM.docx]

High expression of RNF31 is associated with tumor immune cell infiltration and leads to poor prognosis in liver hepatocellular carcinoma

Guifu Xi1†, Runfen Cheng2†, Leiting Liang1, Na Che1, Yalei Wang2, Nan Zhao1, Xiaohui Liang1, Bing Shao2, Xiulan Zhao1*, Danfang Zhang1*

† These authors contributed equally to this work and share first authorship

1 Department of Pathology, Tianjin Medical University, Tianjin 300070, China

2 Tianjin Medical University Cancer Institute and Hospital, National Clinical Research Center for Cancer, Key Laboratory of Cancer Prevention and Therapy, Tianjin’s Clinical Research Center for Cancer, Tianjin 300060, China

*Correspondence:

Danfang Zhang, E-mail: [zhangdf@tmu.edu.cn](mailto:zhangdf@tmu.edu.cn).

Xiulan Zhao, E-mail: zhaoxiulan@tmu.edu.cn.


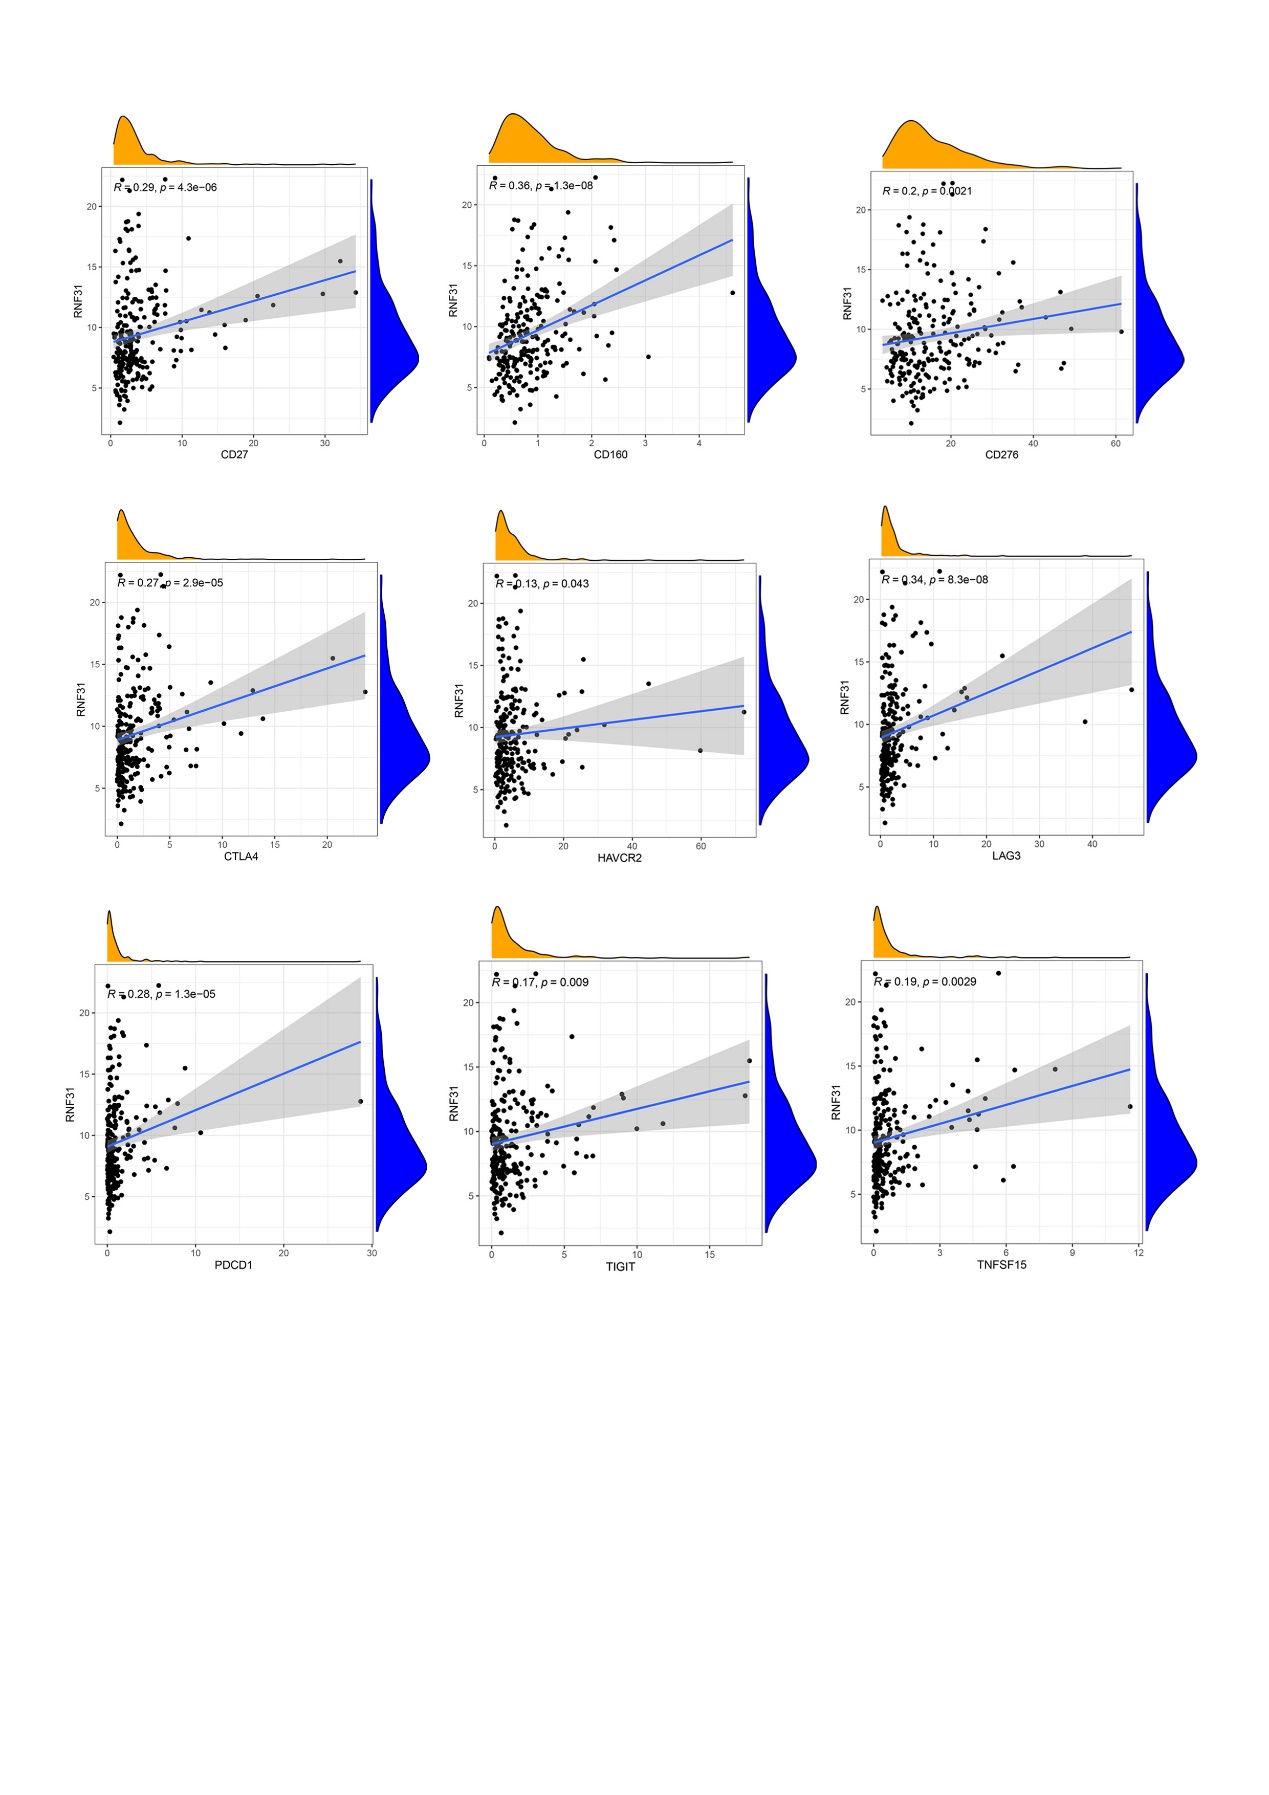


**Supplementary** **Figure** **S1**| A significant positive correlation between RNF31 and immune checkpoint genes.
